# Supplementary material
Source: publisher figshare collection journal article supplement (https://geolsoc.figshare.com/articles/dataset/_/3454658)

## Example Time-Space Plot: Palaeoproterozoic of Southern Africa

3) Department of Geology and Geophysics, Yale University, New Haven, USA

2008

This is an example version of a time-space chart for use by participants in the IGCP 509 project. It is intended to demonstrate the proposed methodology for illustrating how data from the IGCP509 database may be downloaded and used to create a time-space chart in ARCGIS 9.x (*ArcView*).

For this example, data for lithostratigraphic units from domains in southern Africa are used. Some of the relationships illustrated are not necessarily conventional views of the field relationships and are intended to demonstrate the technique. For further discussion see the text in Eglington et al. (IGCP 509 special volume).

Data rectangles (polygons) are colour and pattern coded to represent the rock classes and tectonic settings applicable to the individual lithostratigraphic units. In addition, the time of metamorphism and deformation and the grade of metamorphism may also be illustrated. Other parameters are available in the data files accompanying the manuscript and may be used to illustrate other aspects of the geology.

Suggestions for improvements to this approach and format are welcome

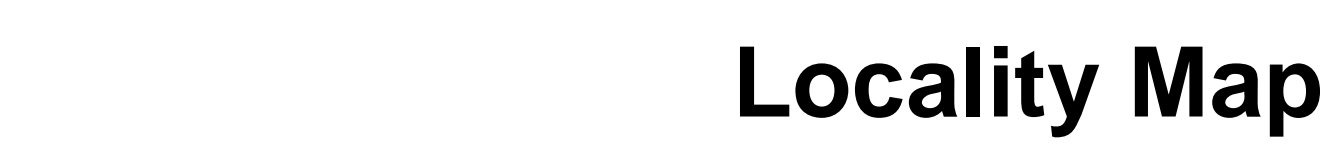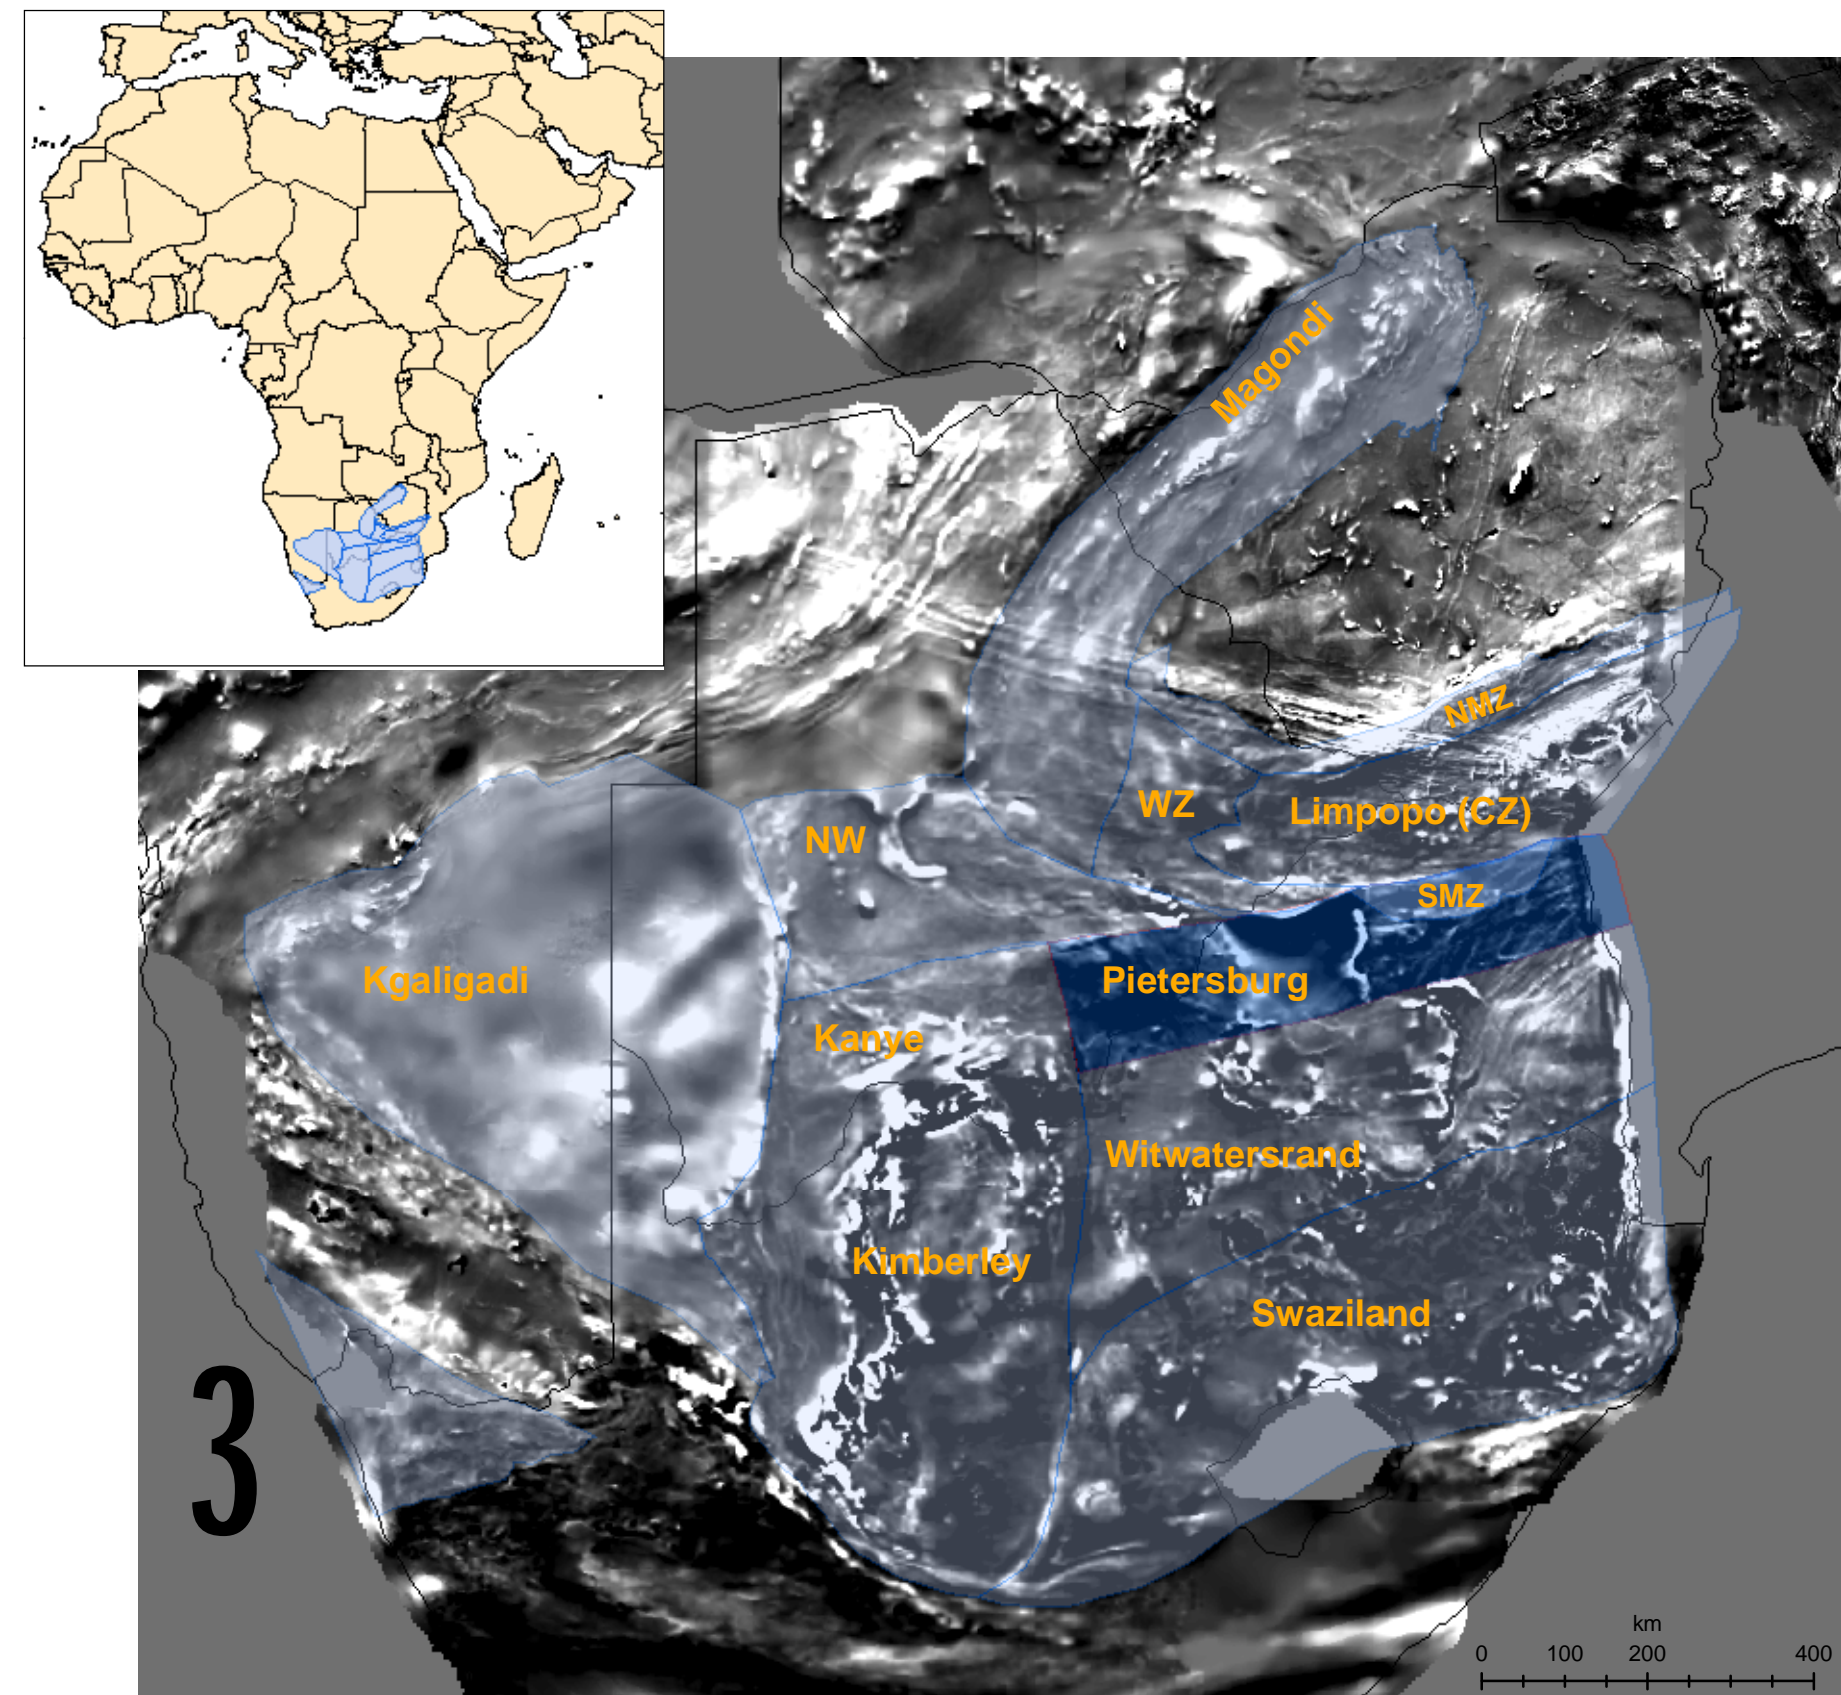

### Legend

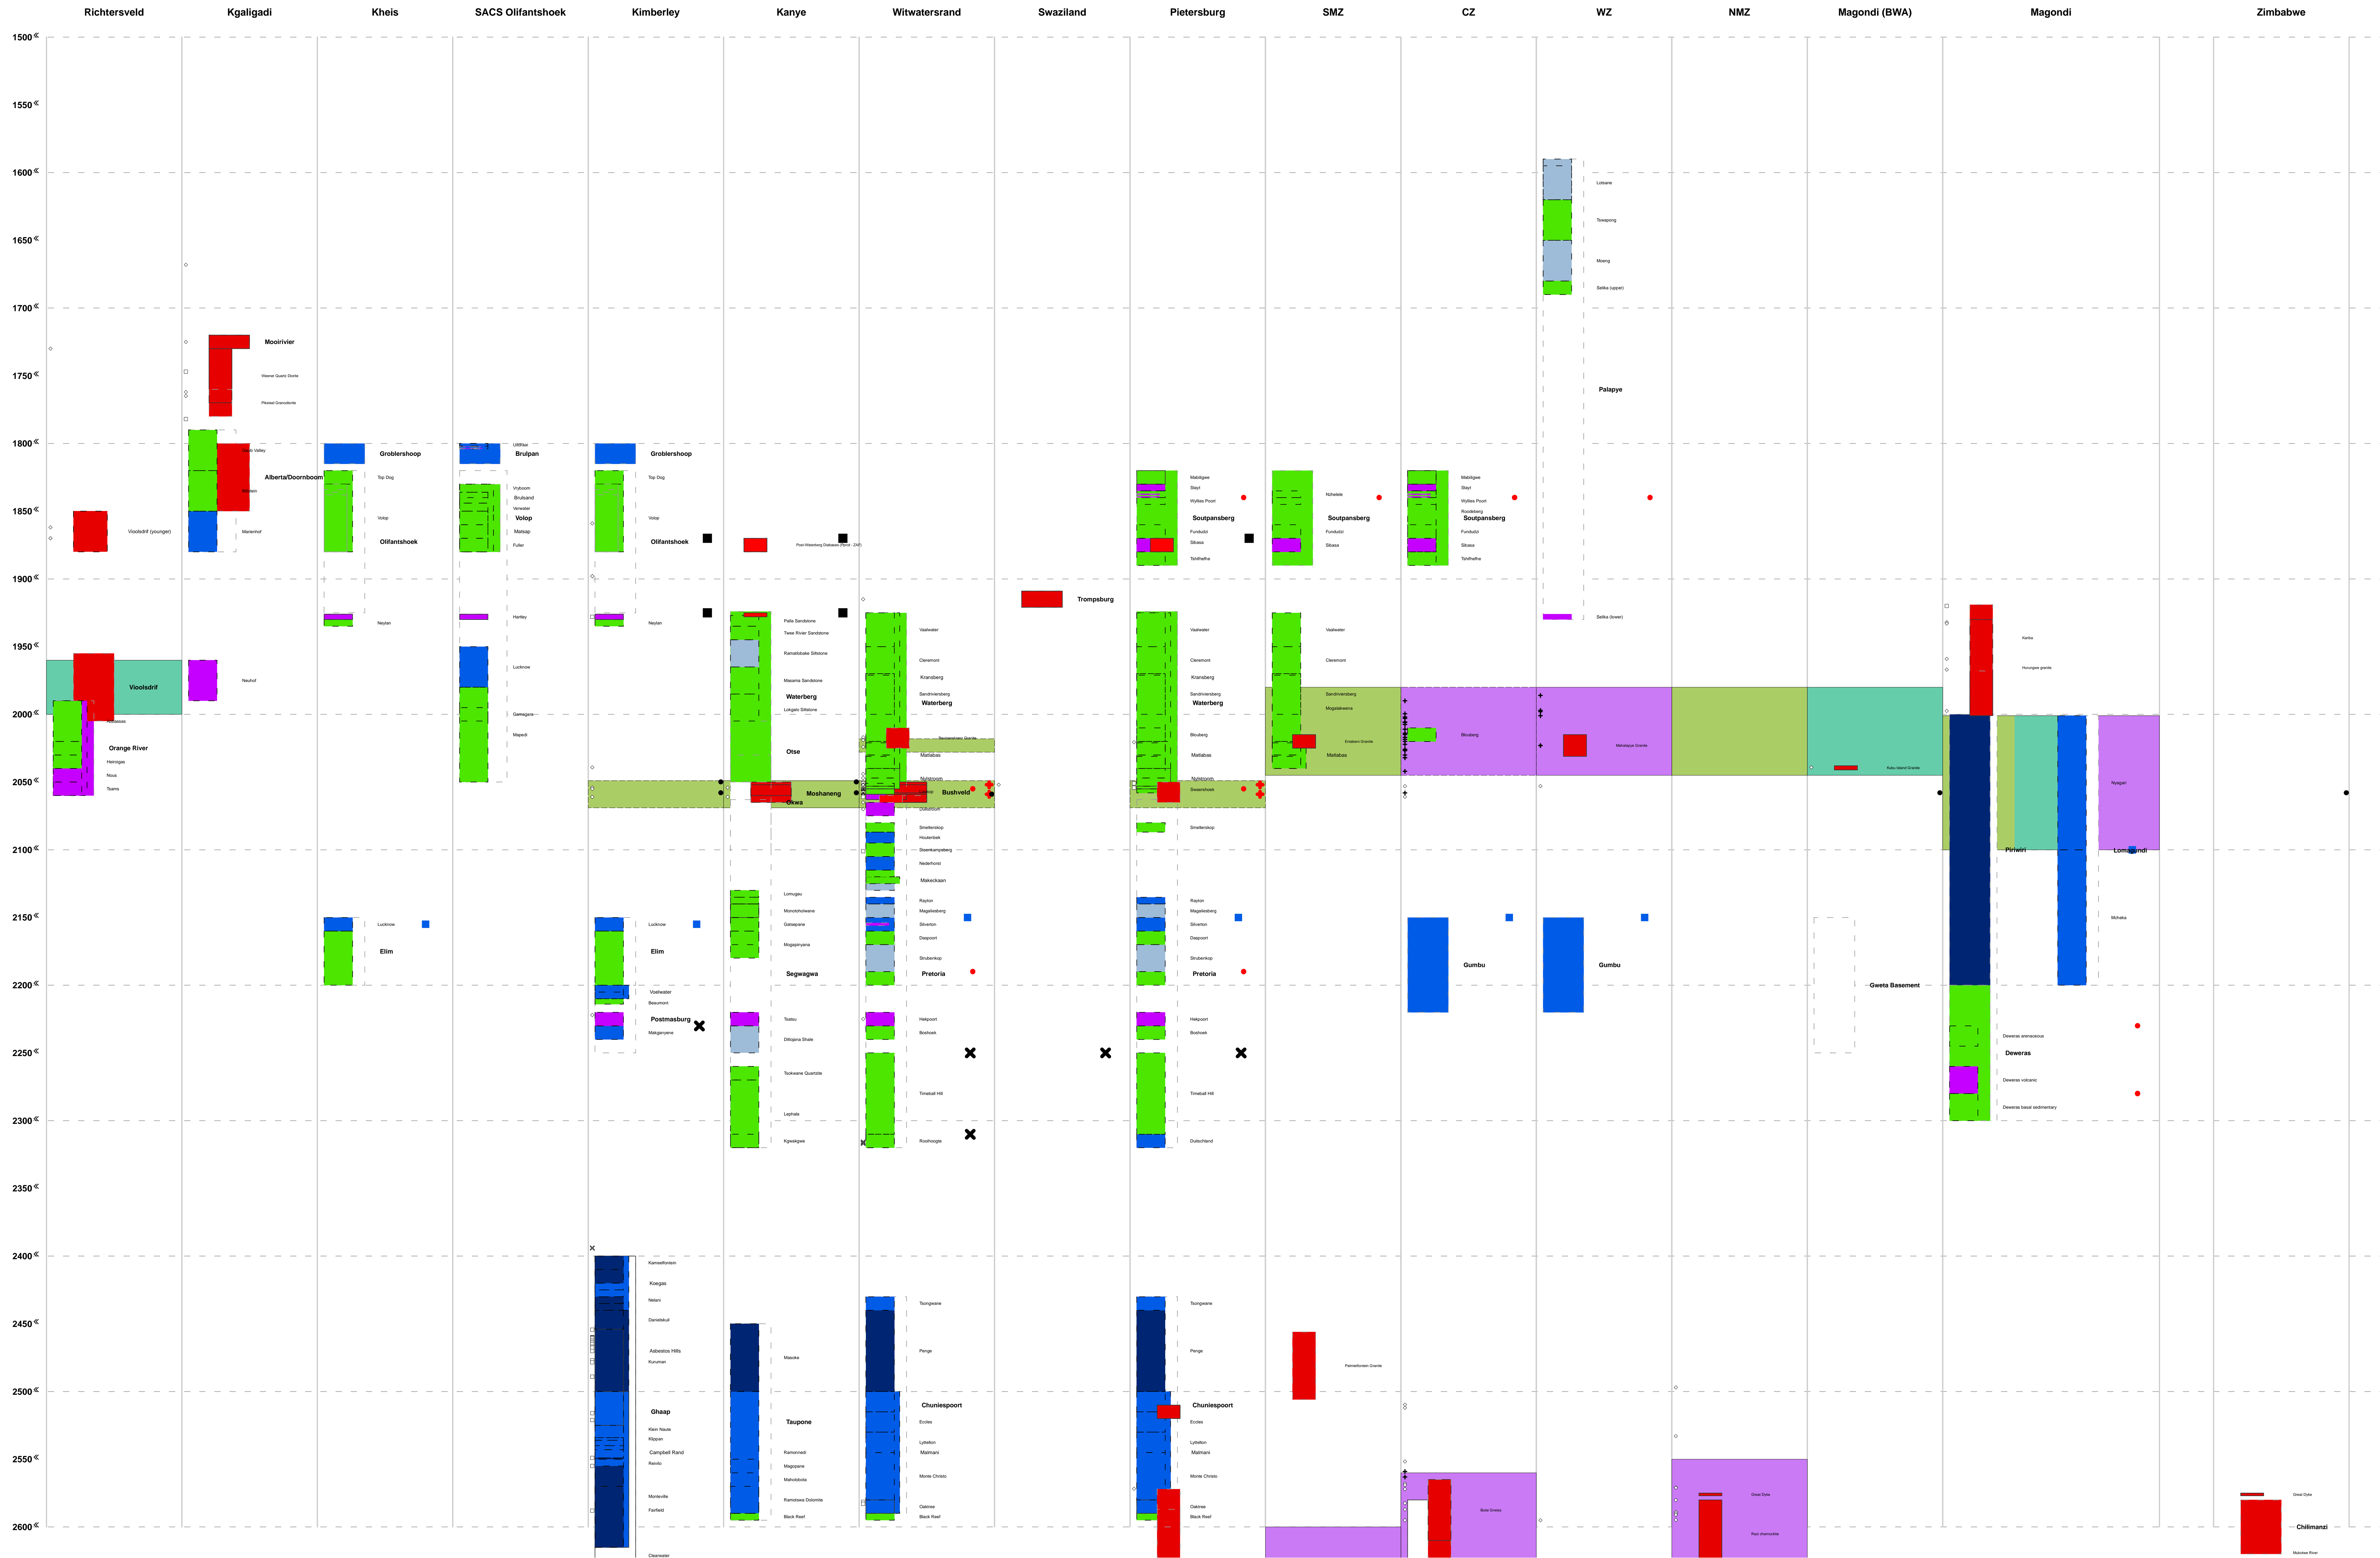

Supplement: Supplementary file 2 [file 1]
